# Supplementary material
Source: Springer Nature journal article supplement (https://www.springermedizin.de/resource/supplementary/13046_2013_676_MOESM3_ESM.pdf/9662686)

**A** Aqueous gall extract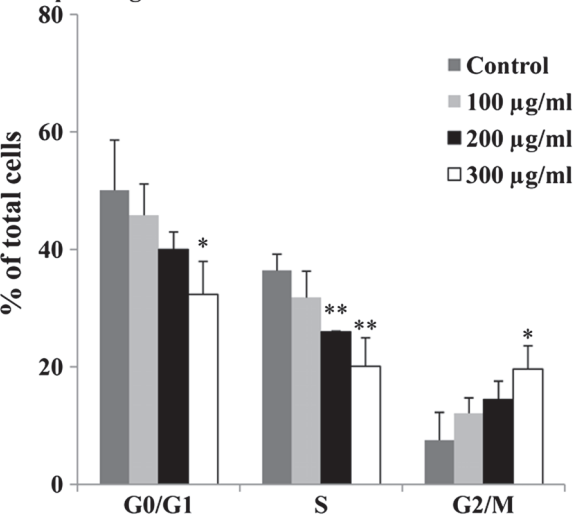**B** Luteolin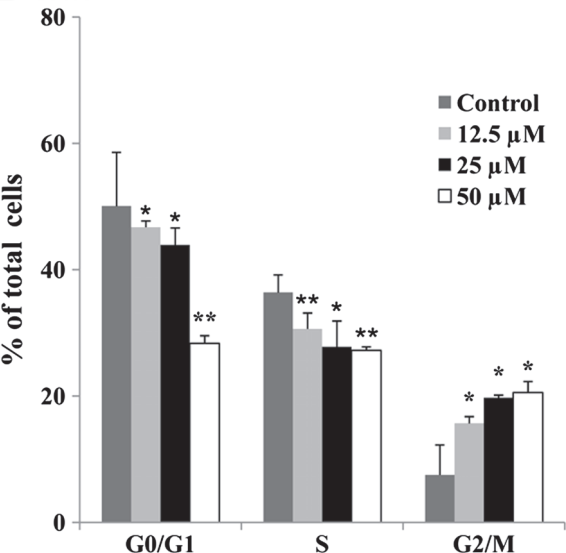

Supplement: MOESM3 [file 9662686]
